# Supplementary material
Source: publisher site journal article supplement (https://www.dovepress.com/article/457187)
Supplement: Supplementary file 1 [file get_supplementary_file.php]

Appendix 1

**Needs Assessment for a Leadership Course in school of medicine in Saudi Arabia (survey)**

We value the knowledge and experience you bring to our college. 
In less than 10 minutes, you can help us understand you better by sharing your expectations on how we can facilitate your development into the successful leader you can be.

……………………………………………………………………………………………………………**Gender:**

1. Male
2. Female
3. **Occupation:**
4. Staff
5. Student
6. **Student: (Academic year)**
7. Year 1
8. Year 2
9. Year 3
10. Year 4
11. Year 5
12. Year 6
13. **Staff: (**Academic Posts)
14. Professor
15. Associate professor
16. Assistant professor
17. Lecturer
18. Teaching Assistant
19. **Position: (**Administrative Position)
20. Dean
21. Vice dean
22. Head of Department
23. Course Leader
24. Curriculum member
25. Staff
26. **Have you had a leadership course in the past?**
27. Yes
28. No
29. Can't remember
30. **If yes how many hours…**
31. **What type, if any, of leadership training have you received in the past?**
32. Attended a school leadership conference
33. Attended a school leadership course
34. Attended a leadership conference outside of school or course
35. Involved in a New Trier Course (SALT, ALPS, etc) or any leadership course
36. Other,
37. **Do you think you are a leader?**
38. Yes
39. No
40. Don't know
41. **Do you have the leadership abilities?**
42. Yes. Sure
43. No
44. Not sure (don’t know)
45. **How would you rate your current leadership experience level?**
46. Basic - –Mainimal
47. Intermediate – Some experience
48. Advance – High experienced
49. **Do you have a leadership course in your school curriculum (from year 1 to 6)?**
50. Yes
51. No
52. Don't know
53. **If yes, How many hours……… and, in which year...**
54. **Do you feel the school provides students with enough leadership opportunities?**
55. Yes
56. No
57. Don't know (not sure)
58. **Do you believe that leadership experience in college benefits a student as a job applicant?**
59. Yes
60. No
61. Don't know(not sure)
62. **How many hours do you think is needed for leadership course in your school curriculum (from year 1-6)?**
63. Less than 16 hour’s
64. Less than 32 hour’s
65. Less than 48 hour’s
66. Greater than 48 hour’s
67. **If you don’t have the leadership course in your school curriculum, do you think it is still too soon to have leadership course in the curriculum? (Need for leadership course in medical school)**
68. Yes
69. No
70. **What is the PRIMARY reason for students wanting a leadership position?**
71. Improve chance of getting into a good internship program
72. They enjoy planning, organizing and encouraging peers (Enjoy the experience)
73. Inspired by current/former student leaders (Inspired by seniors)
74. Belief in mission/purpose (Mission to lead)
75. **What challenges do school student leader's face?**

| **Challenges** | **√ / ×** |
| --- | --- |
| 1. Lack of Communication Skills |  |
| 1. Decision Making Ability |  |
| 1. Organizational Ability |  |
| 1. Motivation |  |
| 1. Delegation |  |
| 1. Conflict Management |  |
| 1. Sense of Responsibility |  |
| 1. Time Management |  |

**Thank you for offering me your time.**
